# Supplementary material for: Synergetic effect of CuS@ZnS nanostructures on photocatalytic degradation of organic pollutant under visible light irradiation
Source: Royal Society of Chemistry journal article supplement (doi:10.1039/c7ra04250g), 2017-01-01
Supplement: c7ra04250g1.pdf [file c7ra04250g1.pdf]

## Supplementary Information

### Synergetic effect of CuS@ZnS nanostructures on photocatalytic degradation of organic pollutant under visible light irradiation

S. Harish<sup>a</sup>, J. Archana<sup>b</sup>, M. Navaneethan<sup>a,b\*</sup>, Ponnusamy<sup>b\*\*</sup>, Ajay Singh<sup>c</sup>, Vinay Gupta<sup>d</sup>,

D.K. Aswal<sup>d</sup>, H. Ikeda<sup>a</sup>, Y. Hayakawa<sup>a\*\*\*</sup>

<sup>a</sup>Research Institute of Electronics, Shizuoka University, 3-5-1 Johoku, Naka-ku, Hamamatsu, Shizuoka 432-8011, Japan

<sup>b</sup>Department of Physics and Nanotechnology, SRM University, Kattankulathur, Chennai, 603203, Tamil Nadu, India.

<sup>c</sup>Technical Physics Division, Bhabha Atomic Research Center, Mumbai 400 085, India

<sup>d</sup>Organic and Hybrid Solar Cell Group, CSIR-National Physical Laboratory, New Delhi, India.

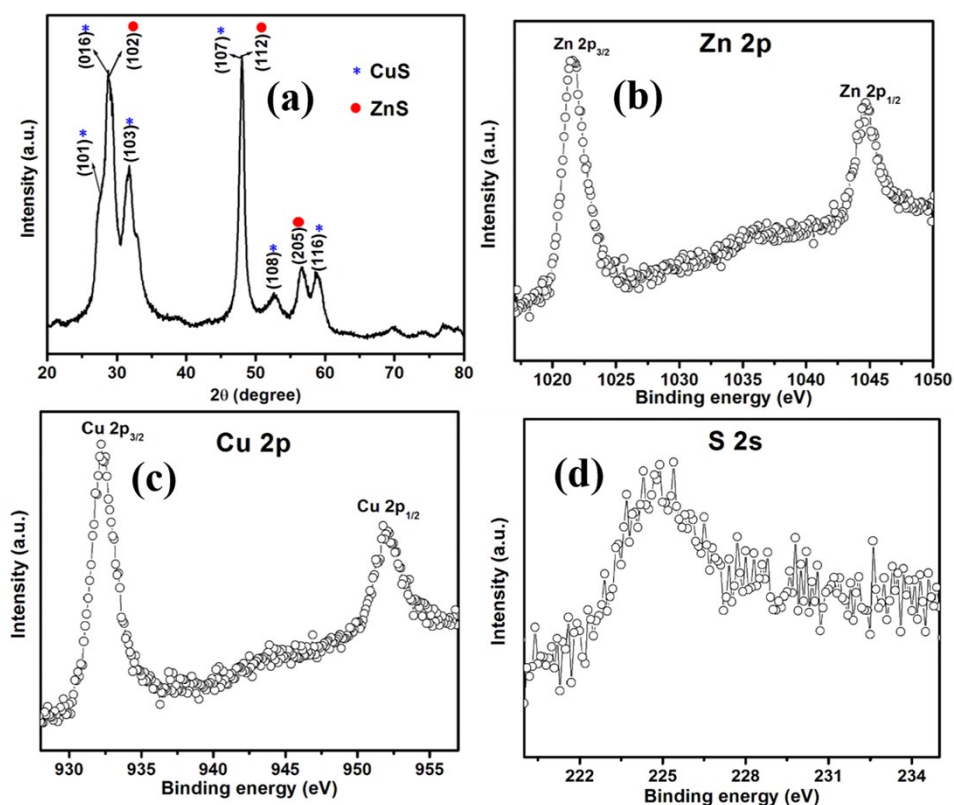

Fig. S1. XRD (a) and XPS spectra of (b) Zn 2p state, (c) Cu 2p state and (d) S 2s states of sample ZC2 after photocatalytic reaction.
